# Supplementary material
Source: publisher figshare collection journal article supplement (https://asha.figshare.com/articles/dataset/_/5150113)
Supplement: Supplementary file 1 [file 1]

**Supplemental Material S2.** Tau-U and improvement rate difference (IRD) data for seven of the eight participants.

| Participant* | Dependent measure   | Tau-U | <i>p</i> | CI (85%)   | IRD  | CI (85%)   |
|--------------|---------------------|-------|----------|------------|------|------------|
| Carmen       | Verbs               | .98   | .0007    | 0.57<>1.40 | .96  | 0.5<>1.0   |
|              | Pronouns            | 1.0   | .0006    | 0.58<>1.42 | 1.0  | 1.0<>1.0   |
|              | Bound morphemes     | 1.0   | .006     | 0.58<>1.42 | 1.0  | 1.0<>1.0   |
|              | Spontaneous clauses | 1.0   | .0006    | 0.58<>1.42 | 1.0  | 1.0<>1.0   |
| Geli         | Verbs               | 1.0   | .0006    | 0.58<>1.42 | 1.0  | 1.0<>1.0   |
|              | Pronouns            | 1.0   | .0006    | 0.58<>1.42 | 1.0  | 1.0<>1.0   |
|              | Bound morphemes     | 1.0   | .006     | 0.58<>1.42 | 1.0  | 1.0<>1.0   |
|              | Spontaneous clauses | 1.0   | .0006    | 0.58<>1.42 | 1.0  | 1.0<>1.0   |
| Joe          | Verbs               | 1.0   | .0016    | 0.55<>1.46 | 1.0  | 1.0<>1.0   |
|              | Pronouns            | 1.0   | .0016    | 0.55<>1.46 | 1.0  | 1.0<>1.0   |
|              | Bound Morphemes     | .48   | .13      | 0.03<>0.92 | .13  | −0.5<>1.0  |
|              | Spontaneous clauses | 1.0   | .0016    | 0.55<>1.46 | 1.0  | 1.0<>1.0   |
| Jesse        | Verbs               | .98   | .0007    | 0.57<>1.40 | .76  | 0.5<>1.0   |
|              | Pronouns            | 1.0   | .0005    | 0.58<>1.42 | 1.0  | 1.0<>1.0   |
|              | Bound morphemes     | .97   | .0008    | 0.55<>1.38 | .72  | 0.5<>1.0   |
|              | Spontaneous clauses | 1.0   | .0005    | 0.59<>1.41 | 1.0  | 1.0<>1.0   |
| Mateo        | Verbs               | 1.0   | .0005    | 0.58<>1.42 | 1.0  | 1.0<>1.0   |
|              | Pronouns            | 1.0   | .0005    | 0.58<>1.42 | 1.0  | 1.0<>1.0   |
|              | Bound morphemes     | 1.0   | .0005    | 0.58<>1.42 | 1.0  | 1.0<>1.0   |
|              | Spontaneous clauses | 1.0   | .0005    | 0.58<>1.42 | 1.0  | 1.0<>1.0   |
| Julian       | Verbs               | 1.0   | .0006    | 0.58<>1.42 | 1.0  | 1.0<>1.0   |
|              | Pronouns            | 1.0   | .0006    | 0.58<>1.42 | 1.0  | 1.0<>1.0   |
|              | Bound morphemes     | .73   | .0111    | 0.32<>1.15 | −.58 | −0.7<>−0.5 |
|              | Spontaneous clauses | 1.0   | .0005    | 0.58<>1.42 | 1.0  | 1.0<>1.0   |
| Kareem       | Verbs               | .8    | .0114    | 0.35<>1.26 | .18  | −0.2<>0.6  |
|              | Pronouns            | 1.0   | .0016    | 0.55<>1.46 | 1.0  | 1.0<>1.0   |
|              | Bound morphemes     | .77   | .015     | 0.31<>1.22 | .18  | −0.6<>0.2  |
|              | Spontaneous clauses | 1.0   | .0016    | 0.55<>1.46 | 1.0  | 1.0<>1.0   |

*Note.* CI = confidence interval.

\*Data excludes Dante because there were too few data points available.
